# Supplementary material for: Chronometric data and stratigraphic evidence support discontinuity between Neanderthals and early Homo sapiens in the Italian Peninsula
Source: Springer Nature journal article supplement (doi:10.1038/s41467-024-51546-9), 2024-09-13
Supplement: MOESM3 [file 41467_2024_51546_MOESM3_ESM.pdf]

Supplementary Data 1: Results of %N screening for potential samples for AMS dating from Castelcivita.

Supplementary Data 2: Analytical data from the Castelcivita site.

Supplementary Data 3: Failed samples from Castelcivita.

Supplementary Data 4: Radiocarbon analytical data for the AMS dates of charcoal from Cavallo.

Supplementary Data 5: Radiocarbon analytical data for the bone dates from Cavallo. Species identification is by ZooMS.

Supplementary Data 6: Chemistry of sediment samples and dose rates to quartz grains.

Supplementary Data 7: OxCal `Order` analysis of Start and End boundaries in the various models built in the main paper.

Supplementary Code 1: We provide the Bayesian `CQL` codes used in the OxCal model building in this text file.
